# Supplementary material for: Personal Recovery Among Service Users Compared With Siblings and a Control Group: A Critical Note on Recovery Assessment
Source: Atypon-hosted journal article supplement (doi:10.1176/appi.ps.201900049), 2019-08-27
Supplement: appi.ps.201900049.ds001.pdf [file appi.ps.201900049.ds001.pdf]

Pearson's correlation coefficients of the total RAS score with other scales in service users  
RAS total

|                           | <i>r</i> |
|---------------------------|----------|
| WHOQOL Physical           | 0.46*    |
| WHOQOL Psychological      | 0.58*    |
| WHOQOL Social             | 0.36*    |
| WHOQOL Environmental      | 0.41*    |
| PANSS Positive            | -0.14*   |
| PANSS Negative            | -0.25*   |
| PANSS General             | -0.27*   |
| SFS withdrawal            | 0.38*    |
| SFS interaction           | 0.43*    |
| SFS independence-perf     | 0.26*    |
| SFS independence-comp     | 0.25*    |
| SFS recreation            | 0.29*    |
| SFS pro-social            | 0.37*    |
| SFS employment/occupation | 0.19*    |
| SFS total                 | 0.48*    |
| CAN unmet needs           | -0.16*   |
| RSQ                       | -0.15*   |

\*p<0.001

Descriptives and factor loadings of the Dutch version of the 24-item RAS for service users

| Item                                                                   |                                                                                    | Mean (SD)   | Factor loading |
|------------------------------------------------------------------------|------------------------------------------------------------------------------------|-------------|----------------|
| <b>Factor 1: Personal confidence and hope <math>\alpha=0.82</math></b> |                                                                                    |             |                |
| 7                                                                      | Fear doesn't stop me from living the way I want to                                 | 3.43 (1.10) | 0.510          |
| 8                                                                      | I can handle what happens in my life                                               | 3.46 (0.92) | 0.714          |
| 9                                                                      | I like myself                                                                      | 3.79 (0.85) | 0.697          |
| 10                                                                     | If people really knew me, they would like me                                       | 3.82 (0.86) | 0.516          |
| 11                                                                     | I have an idea of who I want to become                                             | 3.44 (1.01) | 0.541          |
| 12                                                                     | Something good will eventually happen                                              | 3.81 (0.87) | 0.561          |
| 13                                                                     | I am hopeful about the future                                                      | 3.75 (0.91) | 0.675          |
| 14                                                                     | I continue to have new interests                                                   | 3.64 (0.96) | 0.599          |
| 21                                                                     | I can handle stress                                                                | 2.85 (1.06) | 0.517          |
| <b>Factor 2: Willingness to ask for help <math>\alpha=0.85</math></b>  |                                                                                    |             |                |
| 18                                                                     | I know when to ask for help                                                        | 3.88 (0.87) | 0.781          |
| 19                                                                     | I am willing to ask for help                                                       | 4.03 (0.80) | 0.825          |
| 20                                                                     | I ask for help when I need it                                                      | 3.86 (0.89) | 0.822          |
| <b>Factor 3: Goal and success orientation <math>\alpha=0.78</math></b> |                                                                                    |             |                |
| 1                                                                      | I have a desire to succeed                                                         | 4.13 (0.91) | 0.430          |
| 2                                                                      | I have my own plan for how to stay or become well                                  | 3.77 (0.92) | 0.608          |
| 3                                                                      | I have goals in life that I want to reach                                          | 3.87 (0.95) | 0.777          |
| 4                                                                      | I believe I can meet my current personal goals                                     | 3.62 (0.89) | 0.748          |
| 5                                                                      | I have a purpose in life                                                           | 3.80 (0.97) | 0.708          |
| <b>Factor 4: Reliance on others <math>\alpha=0.72</math></b>           |                                                                                    |             |                |
| 6                                                                      | Even when I don't care about myself, other people do                               | 4.09 (0.83) | 0.625          |
| 22                                                                     | I have people I can count on                                                       | 4.20 (0.74) | 0.718          |
| 23                                                                     | Even when I don't believe in myself, other people do                               | 3.98 (0.82) | 0.717          |
| 24                                                                     | It is important to have a variety of friends                                       | 3.94 (0.89) | 0.496          |
| <b>Factor 5: No domination by symptoms <math>\alpha=0.75</math></b>    |                                                                                    |             |                |
| 15.                                                                    | Coping with mental illness is no longer the main focus of my life.                 | 3.69 (1.09) | 0.710          |
| 16.                                                                    | My symptoms interfere less and less with my life.                                  | 3.54 (1.10) | 0.832          |
| 17.                                                                    | My symptoms seem to be a problem for shorter periods of time each time they occur. | 3.54 (1.12) | 0.610          |

## Clinical significance of difference between service users, siblings and healthy controls – total scale and subscales

|                                                         | Service users not in remission n=225 |      |                  |      | Service users in remission n=336 |      |                    |      | Siblings n=630     |      |                    |      | Healthy controls n=372 |      |                    |      |
|---------------------------------------------------------|--------------------------------------|------|------------------|------|----------------------------------|------|--------------------|------|--------------------|------|--------------------|------|------------------------|------|--------------------|------|
|                                                         | Recovered*                           |      | Not recovered    |      | Recovered                        |      | Not recovered      |      | Recovered          |      | Not recovered      |      | Recovered              |      | Not recovered      |      |
| RAS total, excluding subscale No domination by symptoms | N                                    | %    | N                | %    | N                                | %    | N                  | %    | N                  | %    | N                  | %    | N                      | %    | N                  | %    |
| criterion A                                             | 4 <sup>a</sup>                       | 1.8  | 221 <sup>a</sup> | 98.2 | 15 <sup>a</sup>                  | 4.5  | 321 <sup>a</sup>   | 95.5 | 37 <sup>a</sup>    | 5.9  | 593 <sup>a</sup>   | 94.1 | 23 <sup>a</sup>        | 6.2  | 349 <sup>a</sup>   | 93.8 |
| criterion B                                             | 197 <sup>a</sup>                     | 87.6 | 28 <sup>a</sup>  | 12.4 | 313 <sup>a,b</sup>               | 93.2 | 23 <sup>a,b</sup>  | 6.8  | 613 <sup>c</sup>   | 97.3 | 17 <sup>c</sup>    | 2.7  | 361 <sup>b,c</sup>     | 97.0 | 11 <sup>b,c</sup>  | 3.0  |
| criterion C                                             | 82 <sup>a</sup>                      | 36.4 | 143 <sup>a</sup> | 63.6 | 161 <sup>b</sup>                 | 47.9 | 175 <sup>b</sup>   | 52.1 | 395 <sup>c</sup>   | 62.7 | 235 <sup>c</sup>   | 37.3 | 238 <sup>c</sup>       | 64.0 | 134 <sup>c</sup>   | 36.0 |
| RAS subscale Personal confidence and hope               | N                                    | %    | N                | %    | N                                | %    | N                  | %    | N                  | %    | N                  | %    | N                      | %    | N                  | %    |
| criterion A                                             | 6 <sup>a</sup>                       | 2.7  | 219 <sup>a</sup> | 97.3 | 9 <sup>a</sup>                   | 2.7  | 327 <sup>a</sup>   | 97.3 | 33 <sup>a</sup>    | 5.2  | 597 <sup>a</sup>   | 94.8 | 20 <sup>a</sup>        | 5.4  | 352 <sup>a</sup>   | 94.6 |
| criterion B                                             | 190 <sup>a</sup>                     | 84.4 | 35 <sup>a</sup>  | 15.6 | 305 <sup>a</sup>                 | 90.8 | 31 <sup>a</sup>    | 9.2  | 604 <sup>b</sup>   | 95.9 | 26 <sup>b</sup>    | 4.1  | 361 <sup>b</sup>       | 97.0 | 11 <sup>b</sup>    | 3.0  |
| criterion C                                             | 55 <sup>a</sup>                      | 24.4 | 170 <sup>a</sup> | 75.6 | 123 <sup>b</sup>                 | 36.6 | 213 <sup>b</sup>   | 63.4 | 378 <sup>c</sup>   | 60.0 | 252 <sup>c</sup>   | 40.0 | 219 <sup>c</sup>       | 58.9 | 153 <sup>c</sup>   | 41.1 |
| RAS Willingness to ask for help                         | N                                    | %    | N                | %    | N                                | %    | N                  | %    | N                  | %    | N                  | %    | N                      | %    | N                  | %    |
| criterion A                                             | 0 <sup>a</sup>                       | 0    | 225 <sup>a</sup> | 100  | 0 <sup>a</sup>                   | 0    | 336 <sup>a</sup>   | 100  | 0 <sup>a</sup>     | 0    | 631 <sup>a</sup>   | 100  | 0 <sup>a</sup>         | 0    | 372 <sup>a</sup>   | 100  |
| criterion B                                             | 211 <sup>a</sup>                     | 93.8 | 14 <sup>a</sup>  | 6.2  | 320 <sup>a</sup>                 | 95.2 | 16 <sup>a</sup>    | 4.8  | 605 <sup>a</sup>   | 96.3 | 23 <sup>a</sup>    | 3.7  | 362 <sup>a</sup>       | 97.3 | 10 <sup>a</sup>    | 2.7  |
| criterion C                                             | 127 <sup>a</sup>                     | 56.4 | 98 <sup>a</sup>  | 43.6 | 233 <sup>b</sup>                 | 69.3 | 103 <sup>b</sup>   | 30.7 | 394 <sup>b,c</sup> | 62.7 | 234 <sup>b,c</sup> | 37.3 | 245 <sup>b,c</sup>     | 65.9 | 127 <sup>b,c</sup> | 34.1 |
| RAS subscale Goal and success orientation               | N                                    | %    | N                | %    | N                                | %    | N                  | %    | N                  | %    | N                  | %    | N                      | %    | N                  | %    |
| criterion A                                             | 0 <sup>a</sup>                       | 0    | 225 <sup>a</sup> | 100  | 0                                | 0    | 337 <sup>a</sup>   | 100  | 0                  | 0    | 631 <sup>a</sup>   | 100  | 0                      | 0    | 372 <sup>a</sup>   | 100  |
| criterion B                                             | 207 <sup>a</sup>                     | 92.0 | 18 <sup>a</sup>  | 8.0  | 321 <sup>a,b</sup>               | 95.3 | 16 <sup>a,b</sup>  | 4.7  | 617 <sup>b</sup>   | 97.8 | 14 <sup>b</sup>    | 2.2  | 361 <sup>b</sup>       | 97.0 | 11 <sup>b</sup>    | 3.0  |
| criterion C                                             | 70 <sup>a</sup>                      | 31.1 | 155 <sup>a</sup> | 68.9 | 111 <sup>a,b</sup>               | 32.9 | 226 <sup>a,b</sup> | 67.1 | 247 <sup>a,b</sup> | 39.1 | 384 <sup>a,b</sup> | 60.9 | 158 <sup>b</sup>       | 42.5 | 214 <sup>b</sup>   | 57.5 |
| RAS subscale Reliance on others                         | N                                    | %    | N                | %    | N                                | %    | N                  | %    | N                  | %    | N                  | %    | N                      | %    | N                  | %    |
| criterion A                                             | 0 <sup>a</sup>                       | 0    | 225 <sup>a</sup> | 100  | 0 <sup>a</sup>                   | 0    | 336 <sup>a</sup>   | 100  | 0 <sup>a</sup>     | 0    | 631 <sup>a</sup>   | 100  | 0 <sup>a</sup>         | 0    | 372 <sup>a</sup>   | 100  |
| criterion B                                             | 197 <sup>a</sup>                     | 87.6 | 28 <sup>a</sup>  | 12.4 | 319 <sup>b</sup>                 | 94.9 | 17 <sup>b</sup>    | 5.1  | 615 <sup>b</sup>   | 97.5 | 16 <sup>b</sup>    | 2.5  | 365 <sup>b</sup>       | 98.1 | 7 <sup>b</sup>     | 1.9  |
| criterion C                                             | 71 <sup>a</sup>                      | 31.6 | 154 <sup>a</sup> | 68.4 | 162 <sup>b</sup>                 | 48.2 | 174 <sup>b</sup>   | 51.8 | 351 <sup>b,c</sup> | 55.6 | 280 <sup>b,c</sup> | 44.4 | 221 <sup>c</sup>       | 59.4 | 151 <sup>c</sup>   | 40.6 |

\*The distinction between Recovered and Not Recovered was generated by applying criteria A, B, and C of clinical significance to the RAS scores.

*Note:* Superscript letters denote whether subgroups differ (in which case superscript letters are different) or do not differ (in which case superscript letters are identical) significantly from each other at the 0.05 level.
